# Supplementary material
Source: PubMed Central journal article supplement (PMC8809095)
Supplement: KID.0000072019SupplementaryData1.pdf [file KID.0000072019SupplementaryData1.pdf]

## SUPPLEMENTAL TABLES

### Contents

Supplemental Table 1. Symptom Questions

Supplemental Table 2. Baseline Characteristics of Symptom Survey Responders and Non-responders in CHOICE

Supplemental Table 3. Baseline Characteristics of Symptom Survey Responders and Non-responders in LUCID

Supplemental Table 4. Prevalence of Uremic Symptoms across HD/PD in CHOICE

Supplemental Table 5. The Spearman correlation between individual symptoms in LUCID

Supplemental Table 6. Baseline Characteristics of Individuals Alive or Not Alive at 1-Year Follow-up in CHOICE

Supplemental Table 7. Association of Uremic Symptom Score with Outcomes in the CHOICE Study

| <b>Supplemental Table 1. Symptom Questions</b> |                                                                               |                                                                  |
|------------------------------------------------|-------------------------------------------------------------------------------|------------------------------------------------------------------|
| <b>Symptom</b>                                 | <b>CHOICE</b>                                                                 | <b>LUCID</b>                                                     |
| Anorexia                                       | Loss of appetite                                                              | Lack of appetite                                                 |
| Nausea                                         | Nausea or vomiting                                                            | Nausea or upset stomach                                          |
| Pruritus                                       | Dry or itchy skin                                                             | Itchy Skin                                                       |
| Excessive Daytime Sleep                        | Enough sleep during night                                                     | Sleepiness during the day                                        |
| Difficulty Concentrating                       | Did you have difficulty doing activities involving thinking and concentration | Difficulty doing activities involving concentrating and thinking |
| Fatigue                                        | Did you feel worn out                                                         | Being washed out or drained                                      |
| Pain                                           | Bodily pain                                                                   | Bodily pain                                                      |

| <b>Supplemental Table 2. Baseline Characteristics of Symptom Survey Responders and Non-responders in CHOICE</b> |                   |                       |          |
|-----------------------------------------------------------------------------------------------------------------|-------------------|-----------------------|----------|
| <b>Characteristic</b>                                                                                           | <b>Responders</b> | <b>Non-responders</b> | <b>P</b> |
| <b>Sample size</b>                                                                                              | 926               | 115                   |          |
| <b>Demographics</b>                                                                                             |                   |                       |          |
| Age, y                                                                                                          | 58 ± 15           | 57 ± 16               | 0.58     |
| Male sex                                                                                                        | 491 (53%)         | 73 (64%)              | 0.03     |
| Black race                                                                                                      | 257 (28%)         | 38 (33%)              | 0.24     |
| <b>Clinical Characteristics</b>                                                                                 |                   |                       |          |
| Diabetes                                                                                                        | 498 (54%)         | 63 (55%)              | 0.86     |
| ICED score                                                                                                      | 1.9 ± 0.8         | 1.9 ± 0.9             | 0.93     |
| Residual kidney function                                                                                        | 749 (81%)         | 45 (39%)              | 0.43     |
| BMI, kg/m <sup>2</sup>                                                                                          | 27.1 ± 6.7        | 26.9 ± 7.1            | 0.69     |
| <b>Dialysis Characteristics</b>                                                                                 |                   |                       |          |
| Dialysis modality, hemodialysis                                                                                 | 697 (75%)         | 70 (61%)              | <0.001   |
| Cause of ESKD, diabetes                                                                                         | 423 (46%)         | 58 (50%)              | 0.43     |
| <b>Predialysis Laboratory Tests</b>                                                                             |                   |                       |          |
| Blood urea nitrogen, mg/dL                                                                                      | 56.9 ± 16.3       | 55.5 ± 16.2           | 0.47     |
| Kt/V <sub>UREA</sub>                                                                                            | 1.3 ± 0.4         | 1.4 ± 0.5             | 0.16     |
| Albumin, g/dL                                                                                                   | 3.6 ± 0.4         | 3.6 ± 0.4             | 0.48     |
| Creatinine, mg/dL                                                                                               | 7.3 ± 2.5         | 7.2 ± 2.6             | 0.70     |
| Calcium, mg/dL                                                                                                  | 9.1 ± 0.7         | 8.8 ± 0.7             | 0.001    |
| Phosphate, mg/dL                                                                                                | 5.2 ± 1.3         | 5.2 ± 1.3             | 0.87     |
| Potassium, mEq/L                                                                                                | 4.5 ± 0.6         | 4.4 ± 0.6             | 0.08     |
| Glucose, mg/dL                                                                                                  | 167 ± 86          | 175 ± 99              | 0.37     |
| Cholesterol, mg/dL                                                                                              | 190 ± 48          | 189 ± 49              | 0.76     |

Values for categorical variables are given as count (percentage); values for continuous variables as mean

Abbreviations: ICED, Index of Coexistent Disease; BMI, Body Mass Index; ESKD, End Stage Kidney Disease.

Chi-square tests for categorical variables and t-tests for continuous variables were used

| <b>Supplemental Table 3. Baseline Characteristics of Symptom Survey Responders and Non-responders in LUCID</b> |                   |                       |                 |
|----------------------------------------------------------------------------------------------------------------|-------------------|-----------------------|-----------------|
| <b>Characteristic</b>                                                                                          | <b>Responders</b> | <b>Non-responders</b> | <b><i>P</i></b> |
| <b>Sample size</b>                                                                                             | 428               | 390                   |                 |
| <b>Demographics</b>                                                                                            |                   |                       |                 |
| Age, y                                                                                                         | 60 ± 15           | 62 ± 15               | 0.55            |
| Male sex                                                                                                       | 258 (60%)         | 241 (62%)             | 0.65            |
| Black race                                                                                                     | 137 (32%)         | 72 (19%)              | <0.001          |
| <b>Clinical Characteristics</b>                                                                                |                   |                       |                 |
| Diabetes                                                                                                       | 231 (54%)         | 227 (58%)             | 0.22            |
| Residual kidney function                                                                                       | 379 (89%)         | 334 (86%)             | 0.21            |
| BMI, kg/m <sup>2</sup>                                                                                         | 28.9 ± 7.7        | 29.7 ± 9.6            | 0.19            |
| <b>Dialysis Characteristics</b>                                                                                |                   |                       |                 |
| Dialysis modality, hemodialysis                                                                                | 413 (97%)         | 379 (97%)             | 0.58            |
| Cause of ESKD, diabetes                                                                                        | 155 (36%)         | 139 (36%)             | 0.86            |

Values for categorical variables are given as count (percentage); values for continuous variables as mean

Abbreviations: BMI, Body Mass Index; ESKD, End Stage Kidney Disease.

Chi-square tests for categorical variables and t-tests for continuous variables were used

| <b>Supplemental Table 4. Prevalence of Uremic Symptoms across HD/PD in CHOICE</b> |                     |                     |          |
|-----------------------------------------------------------------------------------|---------------------|---------------------|----------|
| <b>Symptom</b>                                                                    | <b>HD (N = 697)</b> | <b>PD (N = 229)</b> | <b>P</b> |
|                                                                                   | <b>N (%)</b>        | <b>N (%)</b>        |          |
| Fatigue                                                                           | 90%                 | 88%                 | 0.24     |
| Anorexia                                                                          | 42%                 | 51%                 | 0.04     |
| Pruritus                                                                          | 72%                 | 72%                 | 0.99     |
| Sleepiness                                                                        | 85%                 | 89%                 | 0.36     |
| Nausea/Vomiting                                                                   | 38%                 | 31%                 | 0.047    |
| Difficulty Concentrating                                                          | 54%                 | 57%                 | 0.59     |
| Pain                                                                              | 81%                 | 84%                 | 0.47     |

| <b>Supplemental Table 5. The Spearman correlation between individual symptoms in LUCID</b> |                |                 |                 |                   |                        |                                 |             |
|--------------------------------------------------------------------------------------------|----------------|-----------------|-----------------|-------------------|------------------------|---------------------------------|-------------|
|                                                                                            | <b>Fatigue</b> | <b>Anorexia</b> | <b>Pruritus</b> | <b>Sleepiness</b> | <b>Nausea/Vomiting</b> | <b>Difficulty concentrating</b> | <b>Pain</b> |
| <b>Fatigue</b>                                                                             | 1              |                 |                 |                   |                        |                                 |             |
| <b>Anorexia</b>                                                                            | 0.30<br><0.001 | 1               |                 |                   |                        |                                 |             |
| <b>Pruritus</b>                                                                            | 0.28<br><0.001 | 0.11<br>0.02    | 1               |                   |                        |                                 |             |
| <b>Sleepiness</b>                                                                          | 0.31<br><0.001 | 0.07<br>0.13    | 0.20<br><0.001  | 1                 |                        |                                 |             |
| <b>Nausea/Vomiting</b>                                                                     | 0.35<br><0.001 | 0.45<br><0.001  | 0.24<br><0.001  | 0.12<br>0.02      | 1                      |                                 |             |
| <b>Difficulty concentrating</b>                                                            | 0.31<br><0.001 | 0.22<br><0.001  | 0.25<br><0.001  | 0.22<br><0.001    | 0.23<br><0.001         | 1                               |             |
| <b>Pain</b>                                                                                | 0.35<br><0.001 | 0.23<br><0.001  | 0.24<br><0.001  | 0.19<br><0.001    | 0.29<br><0.001         | 0.27<br><0.001                  | 1           |

| <b>Supplemental Table 6. Baseline Characteristics of Individuals Alive or Not Alive at 1-Year Follow-up in CHOICE</b> |              |                  |          |
|-----------------------------------------------------------------------------------------------------------------------|--------------|------------------|----------|
| <b>Characteristic</b>                                                                                                 | <b>Alive</b> | <b>Not Alive</b> | <b>P</b> |
| <b>Sample size</b>                                                                                                    | 585          | 341              |          |
| <b>Demographics</b>                                                                                                   |              |                  |          |
| Age, y                                                                                                                | 58.3 ± 14.0  | 57.4 ± 16.2      | 0.40     |
| Male sex                                                                                                              | 301 (52%)    | 190 (56%)        | 0.21     |
| Black race                                                                                                            | 171 (29%)    | 86 (25%)         | 0.19     |
| <b>Clinical Characteristics</b>                                                                                       |              |                  |          |
| Diabetes                                                                                                              | 315 (54%)    | 183 (54%)        | 0.97     |
| ICED score                                                                                                            | 1.9 ± 0.8    | 2.0 ± 0.8        | 0.10     |
| Residual kidney function                                                                                              | 481 (82%)    | 268 (79%)        | 0.16     |
| BMI, kg/m <sup>2</sup>                                                                                                | 27.5 ± 6.5   | 26.5 ± 6.9       | 0.04     |
| <b>Dialysis Characteristics</b>                                                                                       |              |                  |          |
| Dialysis modality, hemodialysis                                                                                       | 452 (77%)    | 245 (72%)        | 0.07     |
| Cause of ESKD, diabetes                                                                                               | 275 (47%)    | 148 (43%)        | 0.38     |
| <b>Predialysis Laboratory Tests</b>                                                                                   |              |                  |          |
| Blood urea nitrogen, mg/dL                                                                                            | 56.7 ± 15.3  | 57.2 ± 18.0      | 0.75     |
| Kt/V <sub>UREA</sub>                                                                                                  | 1.3 ± 0.4    | 1.4 ± 0.4        | 0.63     |
| Albumin, g/dL                                                                                                         | 3.6 ± 0.4    | 3.6 ± 0.4        | 0.08     |
| Creatinine, mg/dL                                                                                                     | 7.3 ± 2.3    | 7.3 ± 2.8        | 0.83     |
| Calcium, mg/dL                                                                                                        | 9.1 ± 0.7    | 9.1 ± 0.7        | 0.50     |
| Phosphate, mg/dL                                                                                                      | 5.2 ± 1.2    | 5.3 ± 1.5        | 0.12     |
| Potassium, mEq/L                                                                                                      | 4.5 ± 0.6    | 4.5 ± 0.7        | 0.78     |
| Glucose, mg/dL                                                                                                        | 166 ± 83     | 168 ± 91         | 0.74     |
| Cholesterol, mg/dL                                                                                                    | 192 ± 48     | 188 ± 49         | 0.37     |

Values for categorical variables are given as count (percentage); values for continuous variables, as mean

Abbreviations: ICED, Index of Coexistent Disease; BMI, Body Mass Index; ESKD, End Stage Kidney Disease.

Chi-square tests for categorical variables and t-tests for continuous variables were used

| Supplemental Table 7. Association of Uremic Symptom Score with Outcomes in the CHOICE Study |     |        |         |                  |      |                  |      |                  |      |
|---------------------------------------------------------------------------------------------|-----|--------|---------|------------------|------|------------------|------|------------------|------|
|                                                                                             |     |        | IR Per  | Model 1          |      | Model 2          |      | Model 3          |      |
|                                                                                             | N   | Events | 1000 PY | Unadjusted       | P    | Age, sex, race   | P    | All              | P    |
|                                                                                             |     |        |         | HR (95% CI)      |      | HR (95% CI)      |      | HR (95% CI)      |      |
| <b>Any-Cause Death</b>                                                                      | 926 | 580    | 173     | 1.00 (0.95-1.04) | 0.95 | 1.05 (1.01-1.10) | 0.02 | 1.05 (1.01-1.10) | 0.01 |
| <b>Cardiac Death</b>                                                                        | 924 | 282    | 84      | 0.99 (0.94-1.05) | 0.82 | 1.06 (1.00-1.11) | 0.04 | 1.06 (0.99-1.12) | 0.08 |
| <b>First Cardiovascular Event</b>                                                           | 926 | 516    | 204     | 0.99 (0.95-1.04) | 0.73 | 1.06 (1.00-1.11) | 0.03 | 1.05 (1.00-1.10) | 0.04 |

Abbreviation: HR, Hazard Ratio; CI, Confidence Interval; IR, Incidence Rate; PY, Person Years.

HR represents increase in risk per 10-score decrease (worsening symptoms) in baseline uremic symptom score.

Model 1 was unadjusted.

Model 2 was adjusted for age, sex, and race.

Model 3 was adjusted for variables in Model 2 + Index of Coexisting Disease (ICED) severity score, cause of end-stage renal disease, body mass index (categorized as <18, 18 to 25 and >25 kg/m<sup>2</sup>), residual kidney function (self-reported urine volume > 250 ml), diabetes, dialysis modality, and predialysis labs (albumin, urea, Kt/Vurea, creatinine, calcium, phosphate, potassium, glucose, and cholesterol).
